# Supplementary material for: Green and Cost-Effective Separation of Cadmium from Base Metals in Chloride Medium with Halide-Loaded Anion Exchanger
Source: MDPI journal article supplement (doi:10.3390/pr11041051), 2023-03-31
Supplement: s1 [file s1]

# Green and Cost-effective Separation of Cadmium from Base Metals in Chloride Medium with Halide-Loaded Anion Exchanger

## Supplementary Information

Yanlin Zhang<sup>1,2</sup>, Xiaofei Duan<sup>2</sup>, Chaoquan Hu<sup>1,3</sup>, Guanshang Du<sup>1</sup>, Yong Wang<sup>3,4,5\*</sup>

<sup>1</sup> Zhongke Nanjing Institute of Green Manufacturing Industry, Nanjing, 211135 China

<sup>2</sup> School of Chemistry, The University of Melbourne, Parkville, VIC 3010 Australia

<sup>3</sup> Institute of Process Engineering, Chinese Academy of Sciences, Beijing 100190 China

<sup>4</sup> National Engineering Research Centre of Green Recycling for Strategic Metal Resources, Beijing 100190, China

<sup>5</sup> The University of Chinese Academy of Sciences, Beijing, 101400, China

Correspondence: [wangyong@ipe.ac.cn](mailto:wangyong@ipe.ac.cn) (Yong Wang)

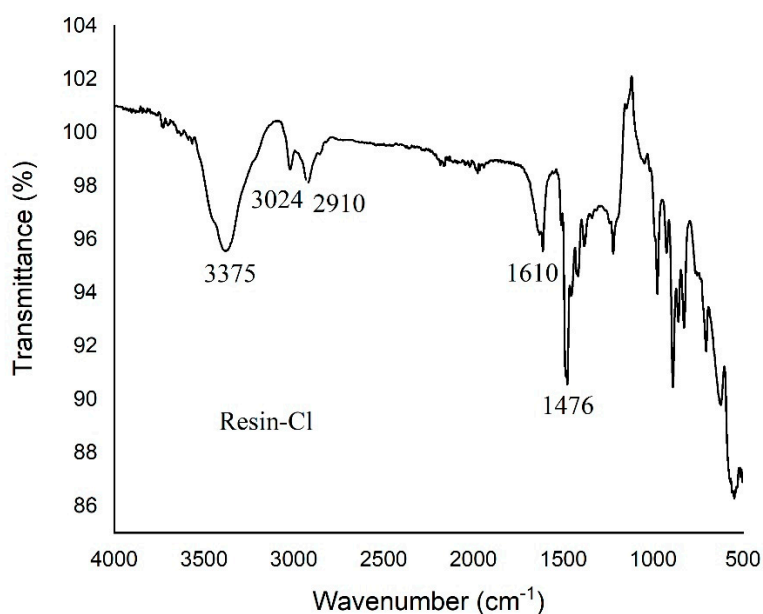

(a)

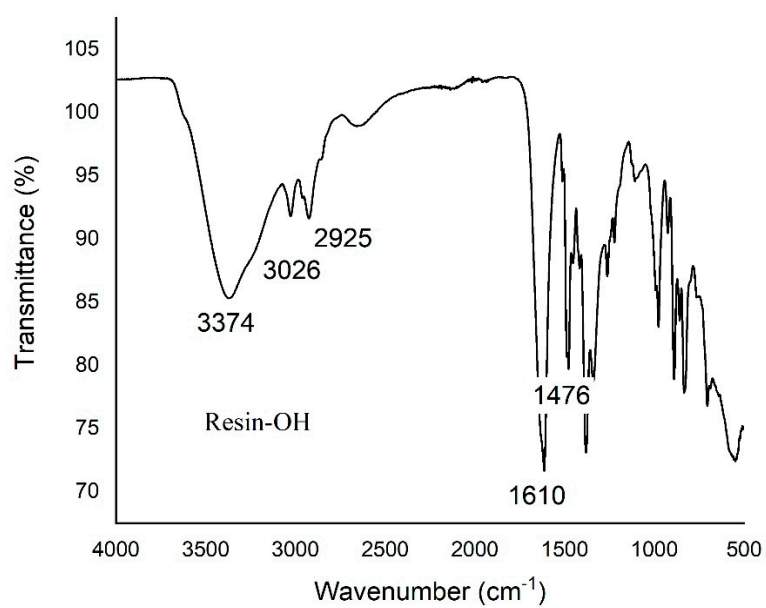

(b)

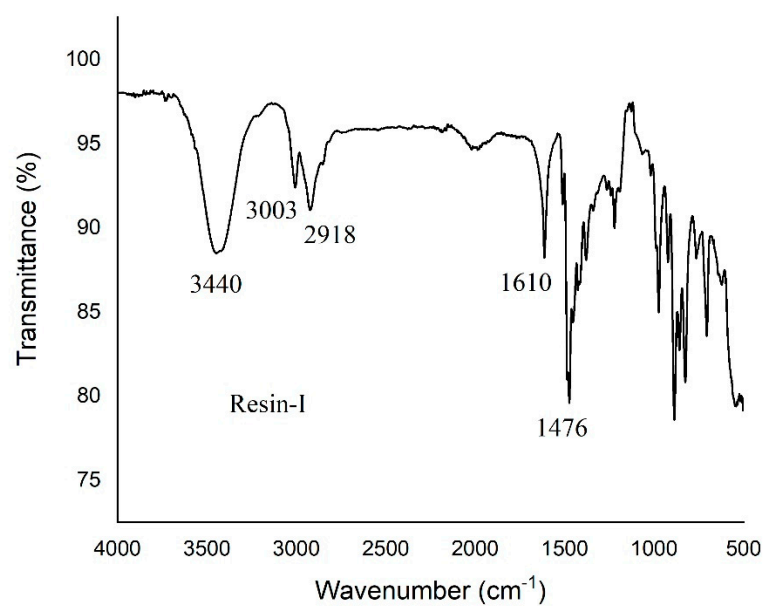

(c)

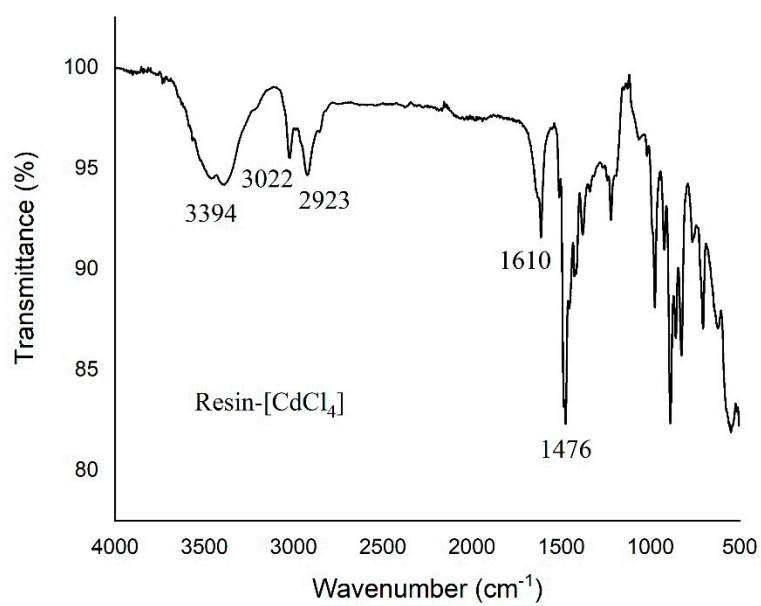

(d)

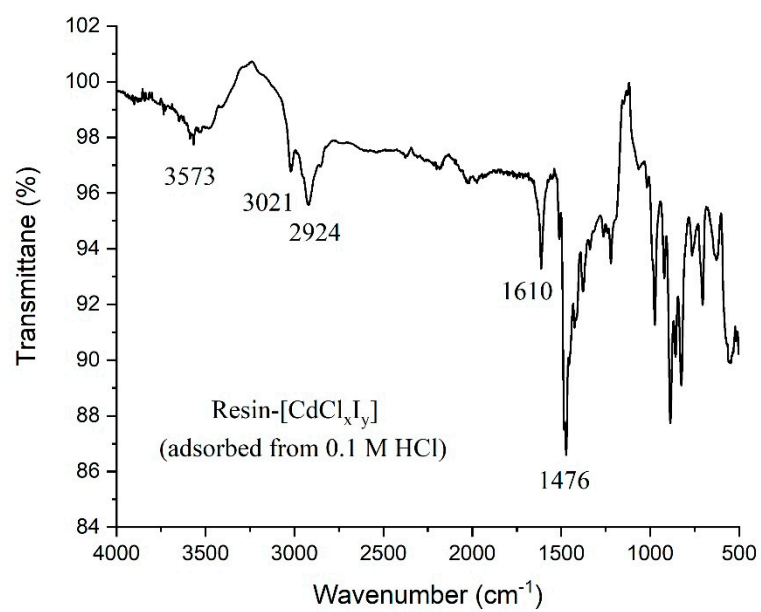

(e)

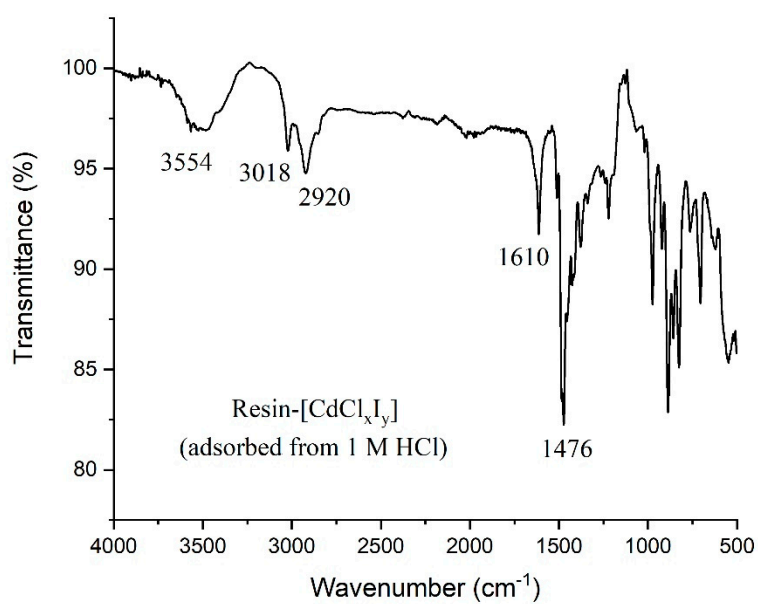

(f)

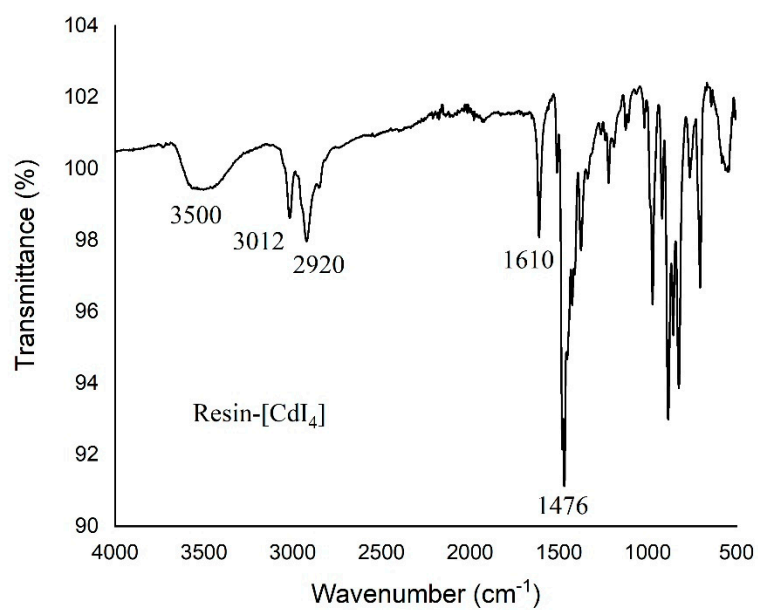

(g)

**Figure S1.** IR spectra of halide and [CdX<sub>4</sub>] loaded anion exchange resins

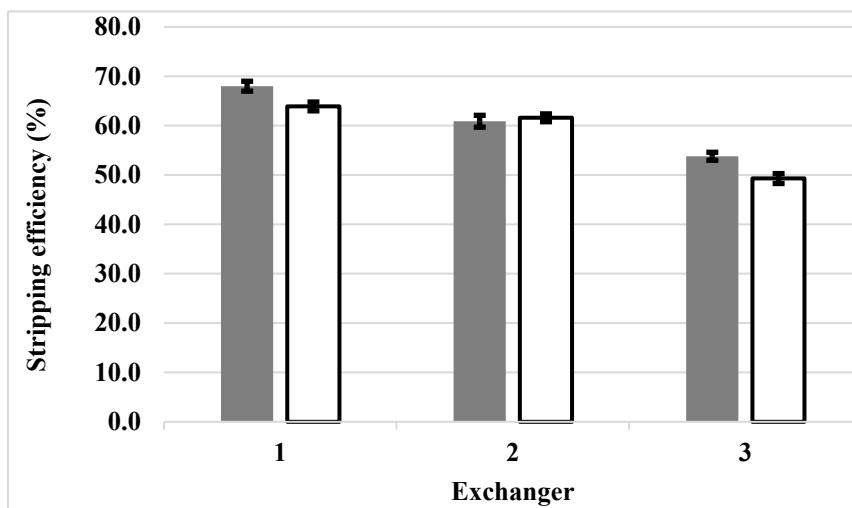

**Figure S2.** Stripping efficiency of Cd<sup>2+</sup> with 20 bed volume of H<sub>2</sub>O from X<sup>-</sup>-loaded Amberlite IRA 900 resin (■) and ZB-2 fibre (□) (1) Cl-loaded, (2) Br-loaded, (3) I-loaded.

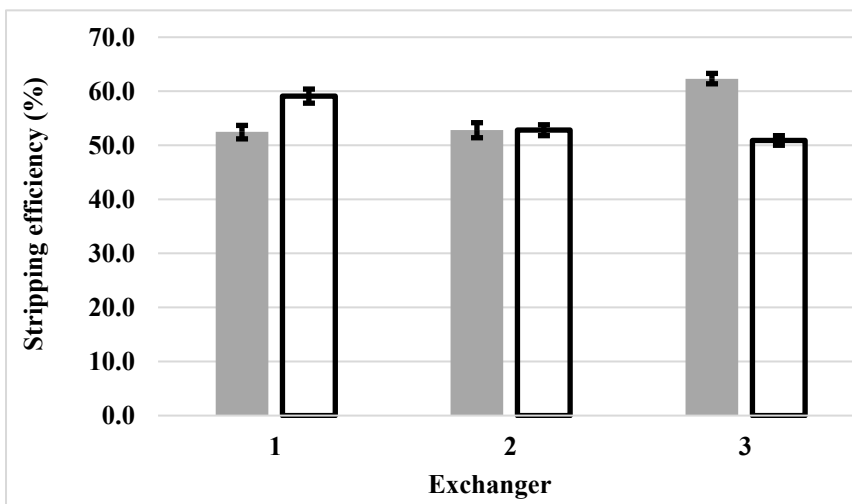

**Figure S3.** Stripping efficiency of Cd<sup>2+</sup> with 10 bed volume of 0.5 M NH<sub>3</sub> from X<sup>-</sup> loaded Amberlite IRA 900 resins (■) and ZB-2 fibre (□) (1) Cl-loaded, (2) Br-loaded, (3) I-loaded.

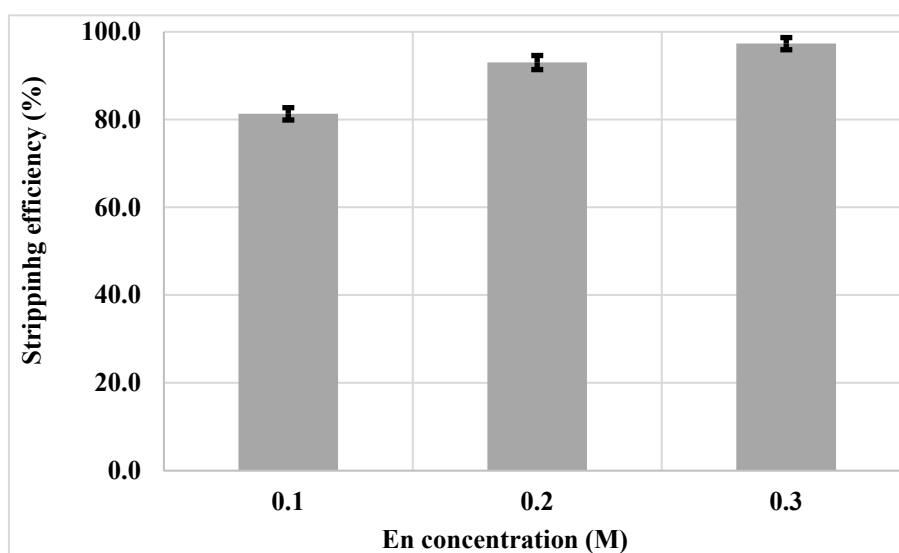

**Figure S4.** Stripping efficiency of Cd<sup>2+</sup> with 5 bed volume of ethylenediamine from I<sup>-</sup>-loaded ZB-2 fibre
